# Supplementary material
Source: PubMed Central journal article supplement (PMC4750080)
Supplement: bi5b01259_si_001.pdf [file bi5b01259_si_001.pdf]

# **Monomeric A $\beta$ <sup>1-40</sup> and A $\beta$ <sup>1-42</sup> Peptides in Solution Adopt Very Similar Ramachandran Map Distributions that Closely Resemble Random Coil**

Julien Roche, Yang Shen, Jung Ho Lee, Jinfu Ying and Ad Bax

Laboratory of Chemical Physics, National Institute of Diabetes and Digestive and Kidney Diseases, National Institutes of Health,  
Bethesda, Maryland, USA

SUPPORTING INFORMATION

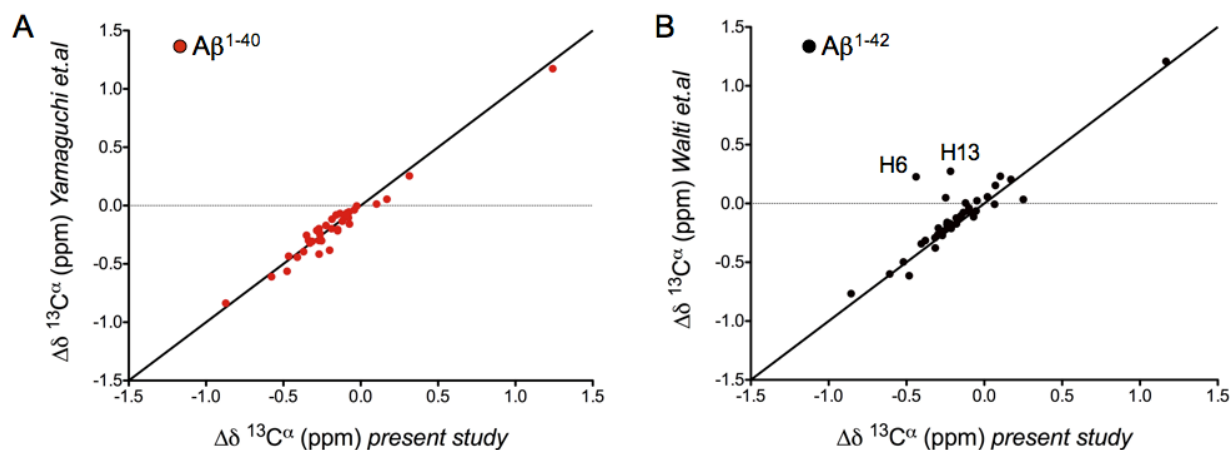

**Figure. S1** : Comparison between the secondary  $^{13}\text{C}^\alpha$  measured in the present study and those reported by Yamaguchi et al.<sup>1</sup> for  $\text{A}\beta^{1-40}$  (A) and by Waelti et al.<sup>2</sup> for  $\text{A}\beta^{1-42}$  (B). The reference random coil values and corrections factors reported by Poulsen et coworkers<sup>3,4</sup> were used to calculate the secondary chemical shifts.

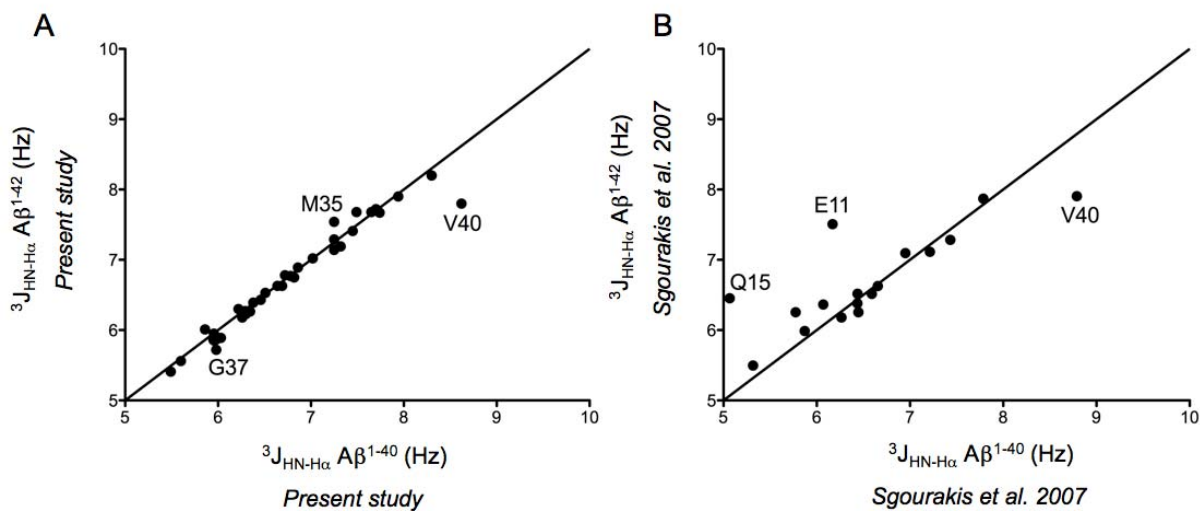

**Figure. S2** : Comparison of the  $^3\text{J}_{\text{HNH}\alpha}$  coupling measured for  $\text{A}\beta^{1-40}$  and  $\text{A}\beta^{1-42}$  in (A) the present study and (B) reported in Sgourakis et al.<sup>5</sup> In each panel the residues presenting the largest  $^3\text{J}_{\text{HNH}\alpha}$  coupling differences between  $\text{A}\beta^{1-40}$  and  $\text{A}\beta^{1-42}$  are labeled.

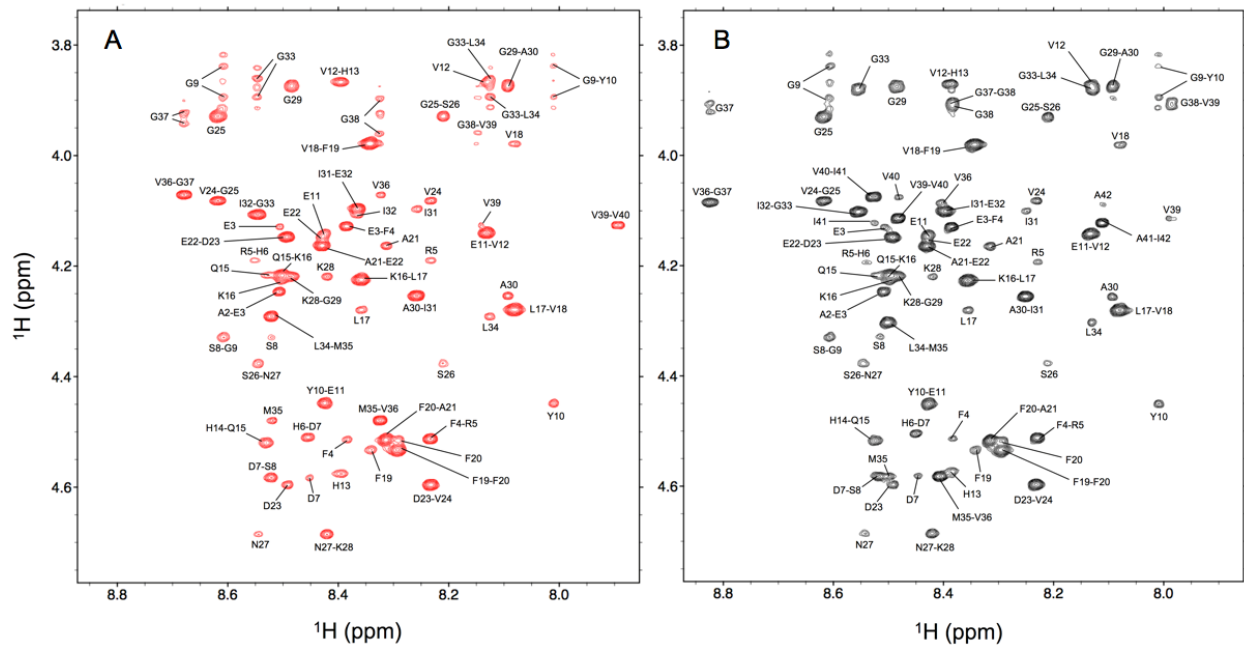

**Figure S3.** Expanded region of the 2D  $F_1$  BASH-decoupled NOESY spectrum recorded at 900 MHz for (A)  $A\beta^{1-40}$  and (B)  $A\beta^{1-42}$  at 277 K. The cross-peaks correspond to sequential and intraresidue couplings between the  $^1H^N$  and  $^1H^\alpha$  protons.

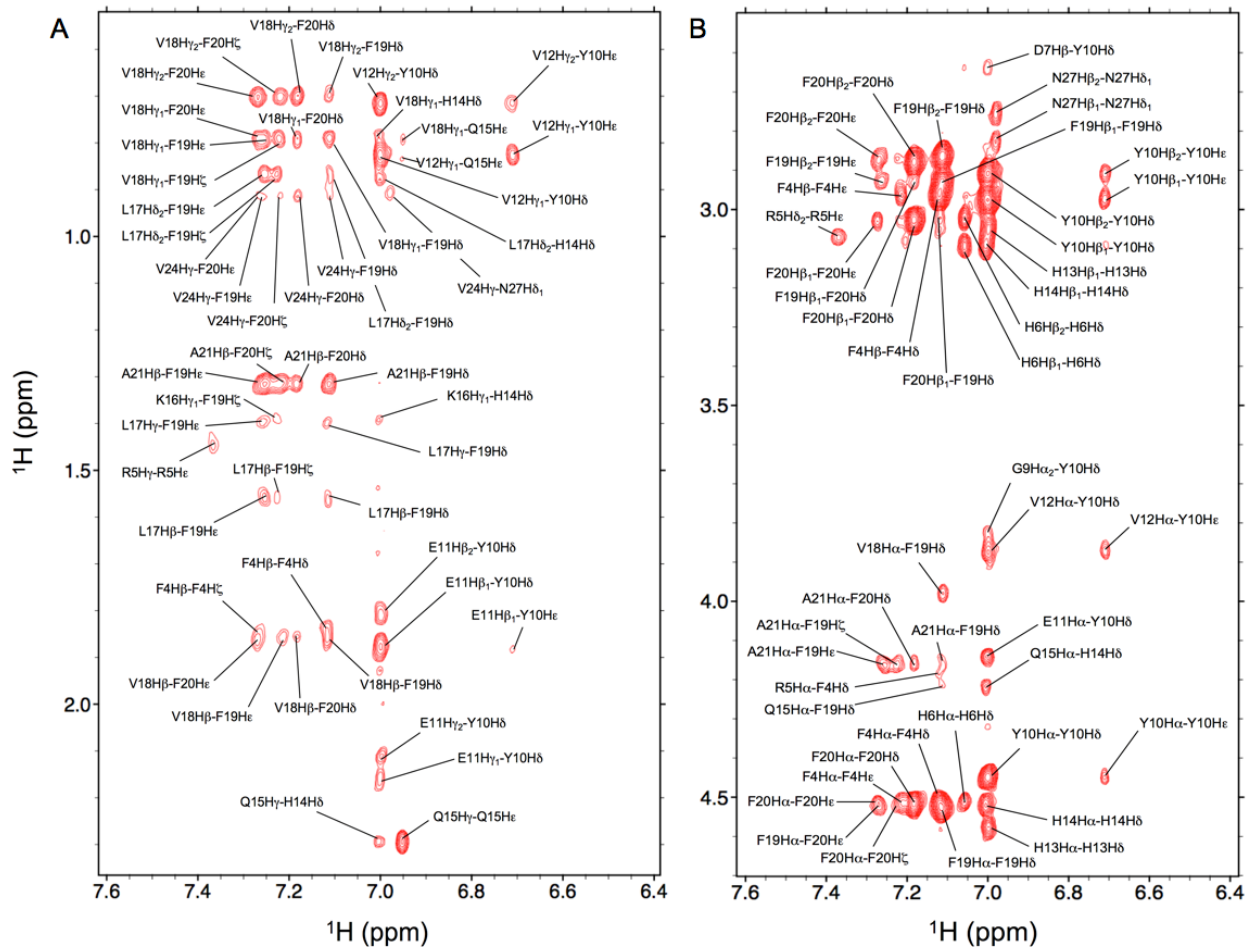

**Figure S4.** Expanded region of the 2D NOESY spectrum recorded at 900 MHz for the  $A\beta^{1-40}$  at 277 K. The aromatic region is shown with the corresponding assignment of the  $^1H$ - $^1H$  NOE contacts in (A) the aliphatic region and (B) the  $^1H^{\alpha}$  and  $^1H^{\beta}$  region.

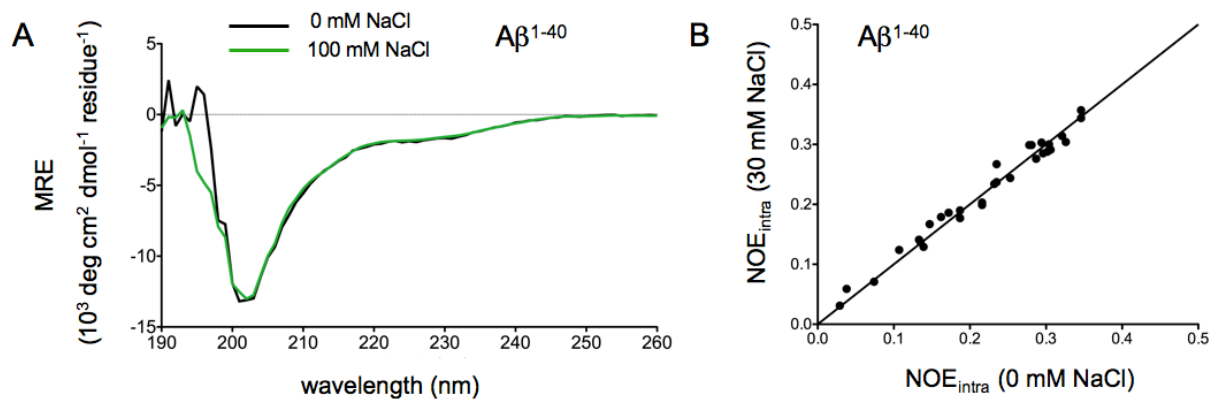

**Figure S5:** (A) Comparison of the CD spectra recorded at 288 K in 20 mM sodium phosphate pH 7.0, for 50  $\mu\text{M}$  samples of  $A\beta^{1-40}$  in the absence of NaCl (black) and in the presence of 100 mM NaCl (green). The CD spectra are recorded as the mean residue ellipticity (MRE). (B) Correlation between the intra-residue  $d_{\text{aN}}(\text{i.i})$  NOE cross peak intensities extracted from 3D NOESY-HSQC spectra recorded at 277 K in 20 mM sodium phosphate pH 7.0 for 150  $\mu\text{M}$  samples of  $A\beta^{1-40}$  in the absence of NaCl and in the presence of 30 mM NaCl.

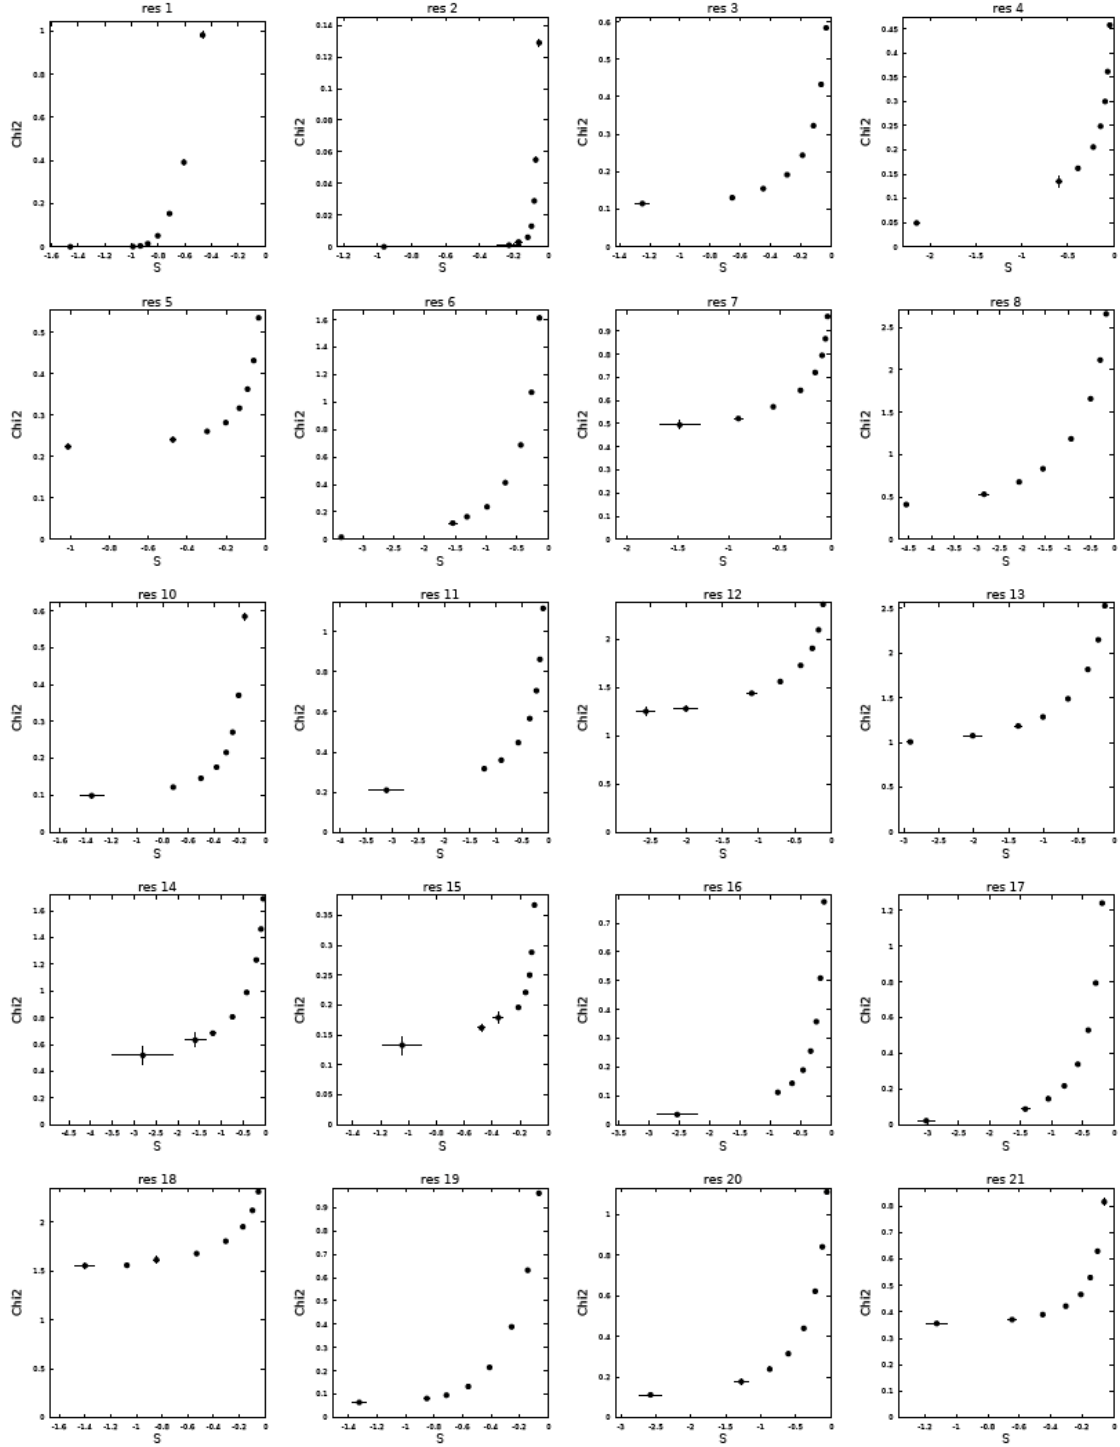

**Figure S6:** Plots of  $\chi^2$  versus  $S$ , the maximum entropy term, derived for different values of  $\theta$ , which controls the weight of the entropy term relative to that of the experimental data.<sup>6</sup> A set of  $\theta$ -values of (left to right) of 0, 0.1, 0.2, 0.4, 0.8, 1.6, 3.0, 6.0 and 10 was used here.

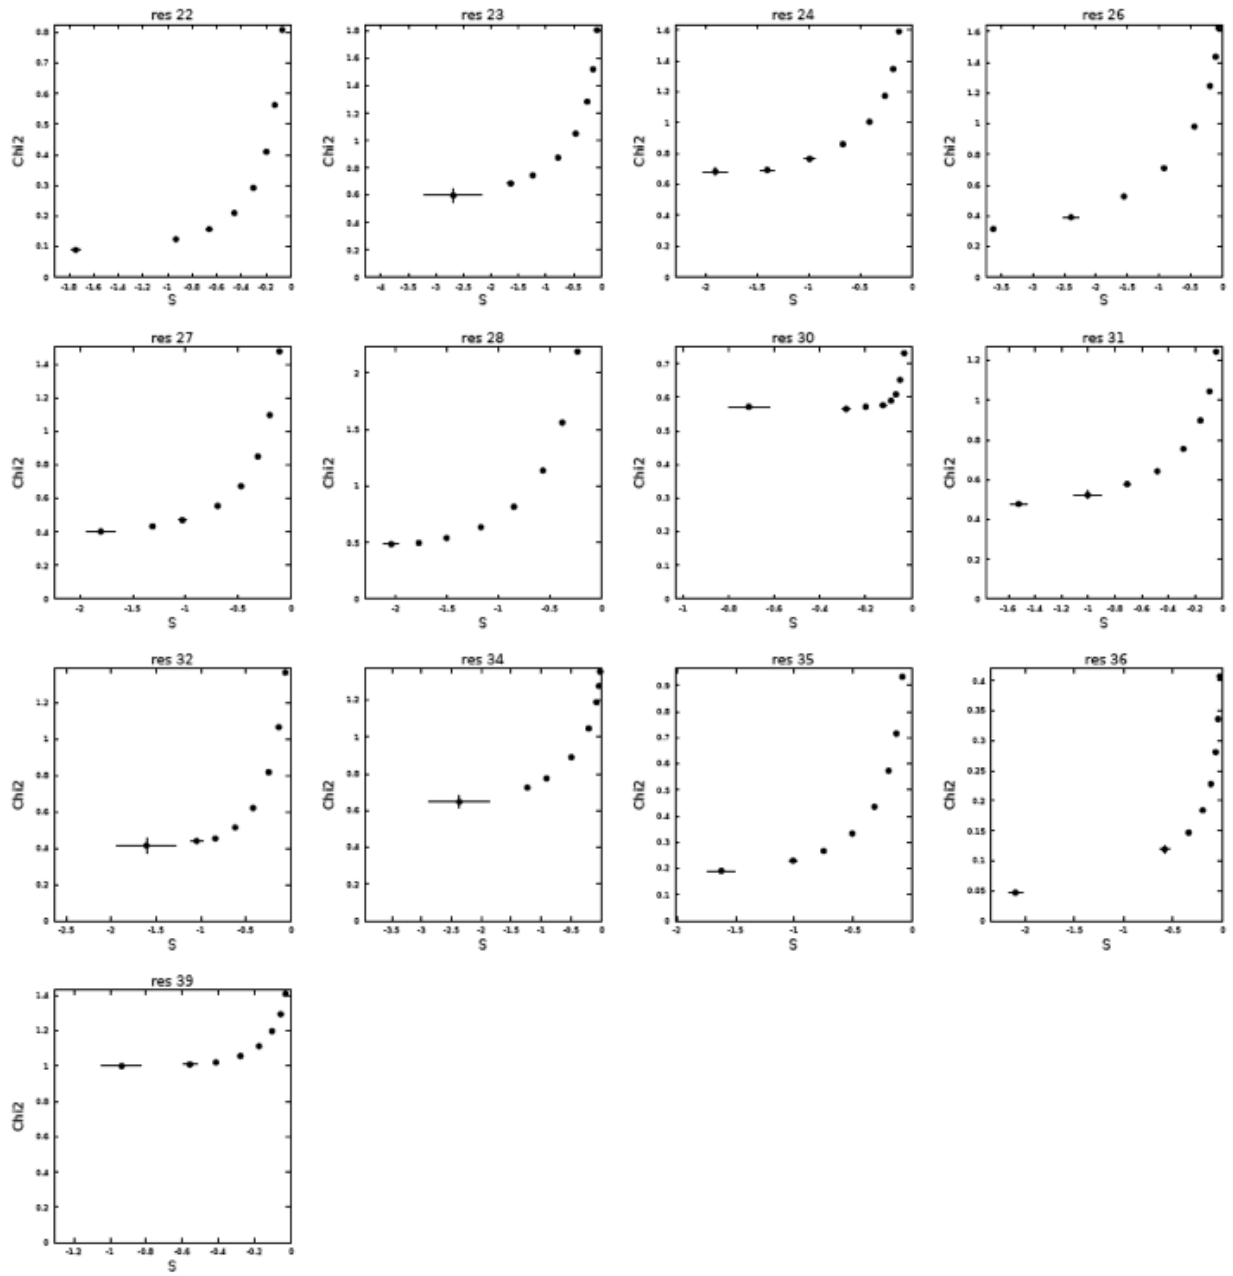

Figure S6 (continued)

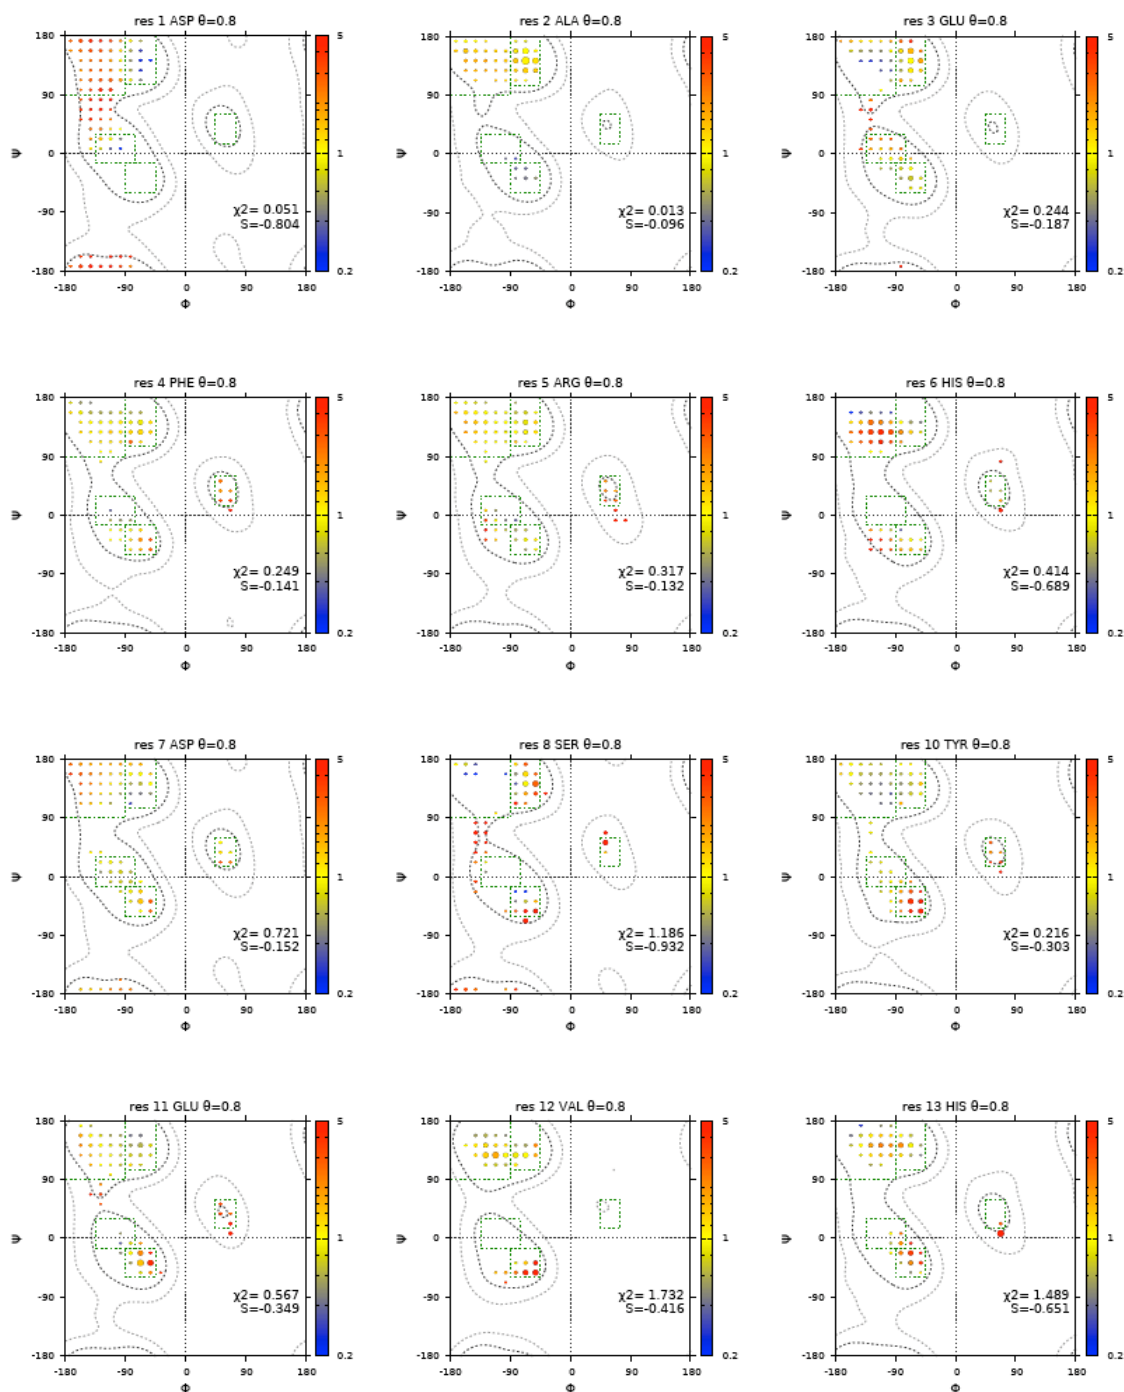

**Figure S7 (part1):**  $\phi/\psi$  torsion angle distributions derived for  $A\beta^{1-40}$  residues using the MERA webserver program.<sup>6</sup> The surface area of each circle is proportional to the population of its  $15^\circ \times 15^\circ$  voxel and the color of each circle reflects its fractional deviation from that seen in the coil database. Green boxes mark secondary structure regions:  $\beta$ , PPII,  $\alpha_L$ , type I  $\beta$ -turn ( $\beta$ -I) and  $\alpha_R$  (see Fig. 5, main text). An entropy weight factor of 0.8 and a diffusion anisotropy parameter  $k = 0.3$  were used. Heavy black dashed lines mark the edges of the most populated region of the residue-specific coil library and thin dashed lines mark the edges of sparsely populated regions.



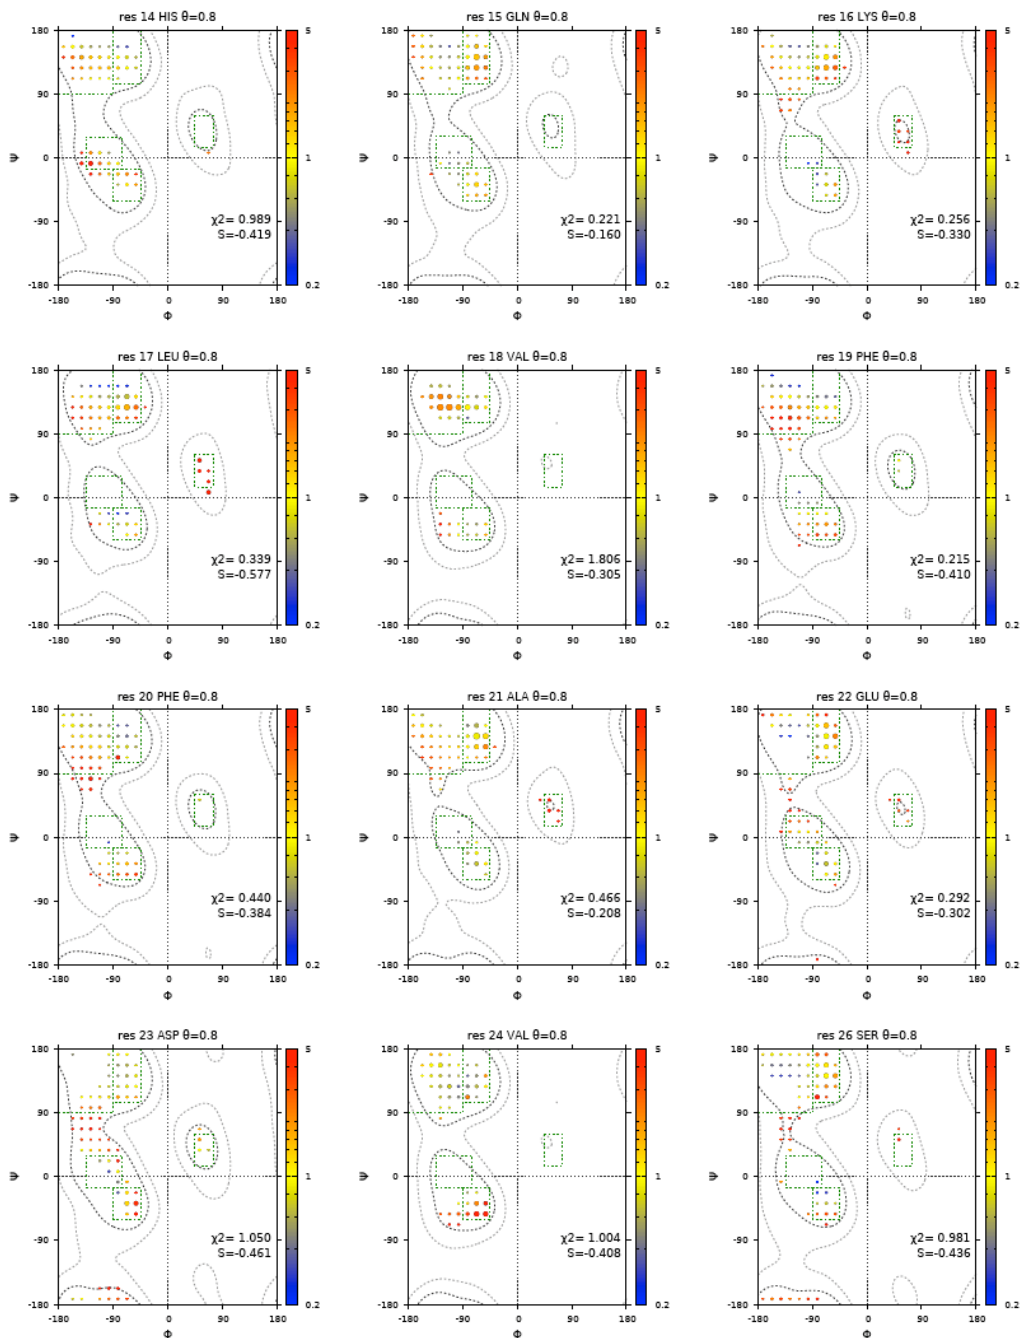

Figure S7 (continued).

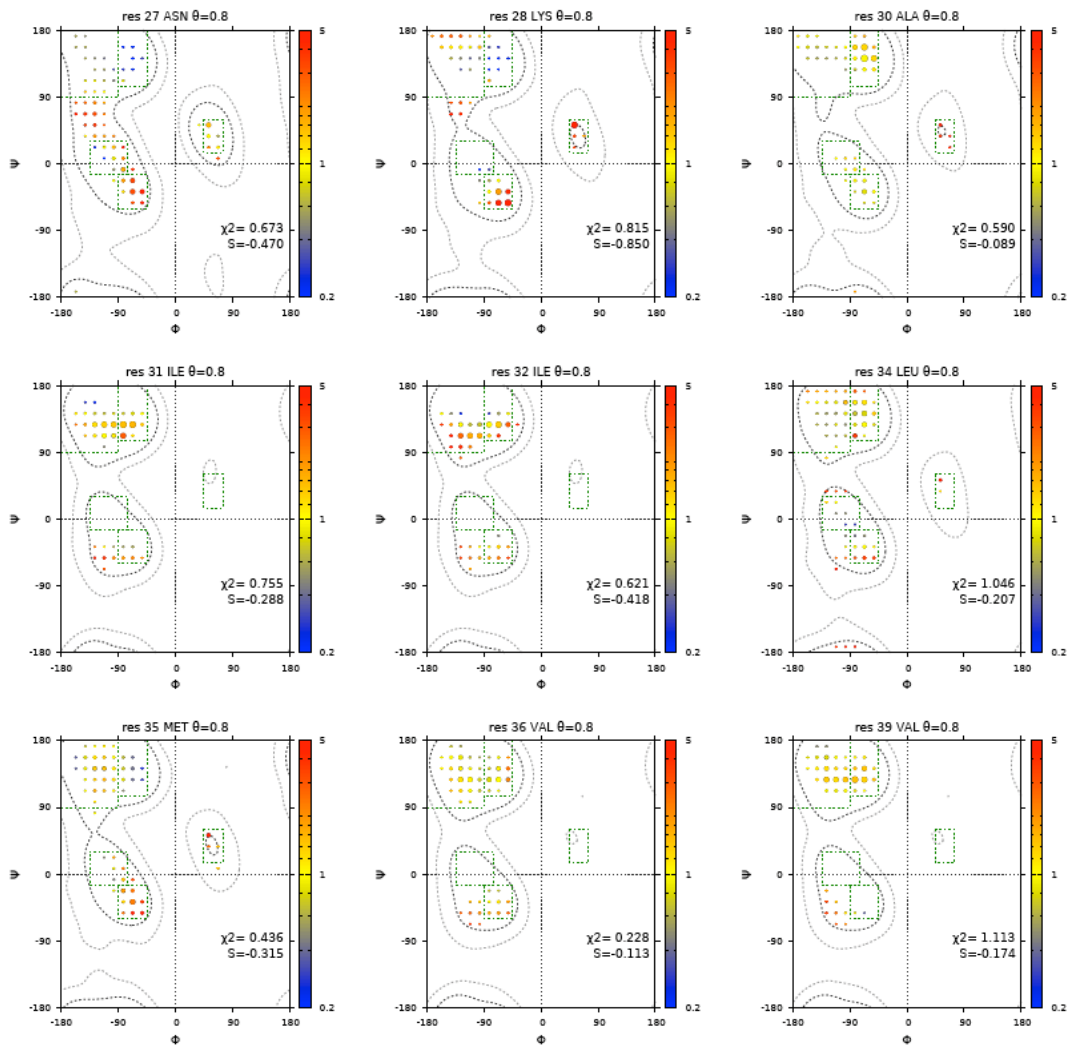

Figure S7 (continued).

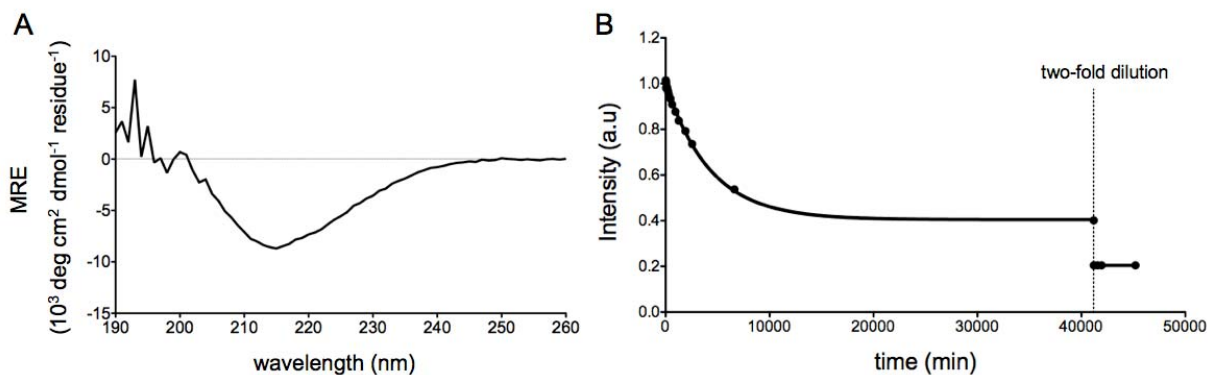

**Figure S8:** (A) CD spectrum recorded at 288 K for a 150  $\mu\text{M}$  sample of  $\text{A}\beta^{1-42}$  in 20 mM sodium phosphate pH 7.0 ( $\text{H}_2\text{O}$  sample) after 28 days at 4°C (see Fig. 6 in the main text and panel B). (B) The same sample was also used to monitor the evolution of methyl group cross peak intensities of in a series of 2D  $^1\text{H}/^{13}\text{C}$  after a two-fold dilution (from 150  $\mu\text{M}$  to 75  $\mu\text{M}$ ). Inspection of the diluted sample after 1 month of further storage at 4°C showed vanishingly weak intensities, i.e., nearly full aggregation of the sample.

## References

1. Yamaguchi, T.; Matsuzaki, K.; Hoshino, M., *FEBS Lett.* **2011**, 585, 1097-1102.
2. Waelti, M. A.; Orts, J.; Voegeli, B.; Campioni, S.; Riek, R., *ChemBioChem* **2015**, 16, 659-669.
3. Kjaergaard, M.; Brander, S.; Poulsen, F. M., *J. Biomol. NMR* **2011**, 49, 139-149.
4. Kjaergaard, M.; Poulsen, F. M., *J. Biomol. NMR* **2011**, 50, 157-165.
5. Sgourakis, N. G.; Yan, Y.; McCallum, S. A.; Wang, C.; Garcia, A. E., *J. Mol. Biol.* **2007**, 368, 1448-1457.
6. Mantyszov, A. B.; Shen, Y.; Lee, J. H.; Hummer, G.; Bax, A., *J. Biomol. NMR* **2015**, 63, 85-95.

**Table S1:**  $^3J_{\text{HNH}\alpha}$  values measured for  $\text{A}\beta^{1-40}$  and  $\text{A}\beta^{1-42}$ 

|     | $\text{A}\beta^{1-40}$ | $\text{A}\beta^{1-42}$ |
|-----|------------------------|------------------------|
| E3  | $6.30 \pm 0.03$        | $6.23 \pm 0.03$        |
| F4  | $7.02 \pm 0.05$        | $7.02 \pm 0.05$        |
| R5  | $7.25 \pm 0.06$        | $7.29 \pm 0.06$        |
| D7  | $6.86 \pm 0.12$        | $6.89 \pm 0.13$        |
| S8  | $5.86 \pm 0.13$        | $6.01 \pm 0.14$        |
| G9  | $6.35 \pm 0.19^a$      | $6.27 \pm 0.20^a$      |
| Y10 | $6.38 \pm 0.07$        | $6.39 \pm 0.07$        |
| E11 | $6.29 \pm 0.12$        | $6.27 \pm 0.13$        |
| V12 | $6.78 \pm 0.12$        | $6.77 \pm 0.12$        |
| H13 | $7.25 \pm 0.19$        | $7.14 \pm 0.20$        |
| Q15 | $6.26 \pm 0.19$        | $6.18 \pm 0.19$        |
| K16 | $6.22 \pm 0.18$        | $6.30 \pm 0.18$        |
| L17 | $6.69 \pm 0.14$        | $6.63 \pm 0.15$        |
| V18 | $8.30 \pm 0.11$        | $8.20 \pm 0.12$        |
| F19 | $7.70 \pm 0.10$        | $7.72 \pm 0.10$        |
| F20 | $7.74 \pm 0.10$        | $7.67 \pm 0.11$        |
| A21 | $5.60 \pm 0.09$        | $5.56 \pm 0.10$        |
| E22 | $5.95 \pm 0.06$        | $5.86 \pm 0.06$        |
| D23 | $6.64 \pm 0.07$        | $6.63 \pm 0.08$        |
| V24 | $6.82 \pm 0.06$        | $6.75 \pm 0.06$        |
| G25 | $5.96 \pm 0.11^a$      | $5.85 \pm 0.12^a$      |
| S26 | $6.51 \pm 0.07$        | $6.53 \pm 0.12$        |
| N27 | $7.32 \pm 0.14$        | $7.19 \pm 0.15$        |
| K28 | $6.46 \pm 0.07$        | $6.43 \pm 0.12$        |
| G29 | $6.03 \pm 0.11^a$      | $5.89 \pm 0.11^a$      |
| A30 | $5.49 \pm 0.04$        | $5.41 \pm 0.04$        |
| I31 | $7.65 \pm 0.05$        | $7.68 \pm 0.05$        |
| I32 | $7.45 \pm 0.06$        | $7.41 \pm 0.07$        |
| G33 | $5.96 \pm 0.12^a$      | $5.95 \pm 0.12^a$      |
| L34 | $6.72 \pm 0.04$        | $6.78 \pm 0.05$        |
| M35 | $7.25 \pm 0.04$        | $7.54 \pm 0.05$        |
| V36 | $7.49 \pm 0.04$        | $7.68 \pm 0.04$        |
| G37 | $5.98 \pm 0.07^a$      | $5.72 \pm 0.07^a$      |
| G38 | $5.99 \pm 0.06^a$      | $5.87 \pm 0.06^a$      |
| V39 | $7.94 \pm 0.02$        | $7.90 \pm 0.02$        |
| V40 | $8.62 \pm 0.02$        | $7.80 \pm 0.02$        |
| I41 |                        | $8.33 \pm 0.01$        |
| A42 |                        | $6.55 \pm 0.02$        |

<sup>a</sup> Values reported for Gly correspond to  $(^3J_{\text{HNH}\alpha 2} + ^3J_{\text{HNH}\alpha 3})/2$

**Table S2:** Experimental parameters measured for  $A\beta^{1-40}$  used as input for the MERA program, including three types of chemical shifts ( $^{15}N$ ,  $^{13}C^\alpha$  and  $^{13}C'$ ), six types of J couplings ( $^3J_{HN-H\alpha}$ ,  $^3J_{C'-C'}$ ,  $^3J_{C'-H\alpha}$ ,  $^1J_{H\alpha-C\alpha}$ ,  $^2J_{C\alpha-N}$  and  $^1J_{C\alpha-N}$ ) and three types of NOE ( $d_{NN}(i,i+1)$ ;  $d_{aN}(i,i)$ ;  $d_{aN}(i,i+1)$ ).

|     | $^{13}C^\alpha$ | $^{13}C'$ | $^{15}N$ | $^3J_{HNH\alpha}$<br>$\pm 0.08$ | $^1J_{H\alpha C\alpha}$<br>$\pm 0.06$ | $^2J_{C\alpha N}$<br>$\pm 0.11$ | $^1J_{NC\alpha}$<br>$\pm 0.11$ | $^3J_{C'C'}$<br>$\pm 0.09$ | $^3J_{C'H\alpha}$<br>$\pm 0.10$ | $d_{aN}(i,i)$<br>$\pm 0.011$ | $d_{aN}(i,i+1)$<br>$\pm 0.003$ | $d_{NN}(i,i+1)$<br>$\pm 0.001$ | $J(0)*10^{-10}$ |
|-----|-----------------|-----------|----------|---------------------------------|---------------------------------------|---------------------------------|--------------------------------|----------------------------|---------------------------------|------------------------------|--------------------------------|--------------------------------|-----------------|
| D1  | 53.270          | -         | -        | -                               | -                                     | -                               | -                              | -                          | -                               | -                            | -                              | -                              | -               |
| A2  | 52.248          | 177.326   | -        | -                               | 144.01                                | -                               | -                              | -                          | -                               | -                            | -                              | -                              | -               |
| E3  | 56.433          | 176.074   | 120.760  | 6.30                            | 142.14                                | 8.04                            | 10.79                          | 0.77                       | 1.99                            | 0.074                        | 0.427                          | 0.077                          | 3.628           |
| F4  | 57.467          | 175.298   | 122.040  | 7.02                            | 145.14                                | 7.95                            | 10.78                          | 1.01                       | 2.62                            | 0.133                        | 0.704                          | 0.096                          | 4.721           |
| R5  | 55.468          | 175.619   | 123.790  | 7.25                            | 142.51                                | 7.95                            | 10.85                          | 1.16                       | 2.63                            | 0.187                        | 0.690                          | 0.237                          | 5.546           |
| H6  | 55.787          | 174.778   | 121.310  | -                               | 144.18                                | 8.26                            | 10.49                          | 1.10                       | 2.87                            | -                            | -                              | -                              | 6.679           |
| D7  | 53.933          | 176.339   | 121.920  | 6.86                            | 143.45                                | 7.75                            | 10.94                          | 1.04                       | 2.45                            | 0.216                        | 0.562                          | 0.189                          | 7.058           |
| S8  | 58.978          | 175.220   | 116.870  | 5.86                            | 142.20                                | 7.97                            | 10.89                          | 1.01                       | 2.28                            | 0.216                        | 0.557                          | 0.225                          | 7.405           |
| G9  | 45.173          | 174.057   | 110.980  | 6.35                            | 141.07                                | 7.06                            | 11.18                          | 0.93                       | -                               | -                            | -                              | 0.283                          | 7.036           |
| Y10 | 58.259          | 175.831   | 120.360  | 6.38                            | 144.27                                | 7.59                            | 10.68                          | 0.93                       | 2.34                            | 0.253                        | 0.732                          | 0.238                          | 8.748           |
| E11 | 56.414          | 176.178   | 122.730  | 6.29                            | 143.16                                | 7.32                            | 10.57                          | 0.90                       | 2.44                            | 0.294                        | 0.939                          | 0.175                          | 9.626           |
| V12 | 62.689          | 176.055   | 121.480  | 6.78                            | 143.37                                | 7.98                            | 10.28                          | 0.91                       | 2.49                            | 0.321                        | 1.325                          | 0.148                          | 9.634           |
| H13 | 55.647          | 174.959   | 122.330  | 7.25                            | 143.98                                | 7.24                            | 11.09                          | 0.81                       | 2.78                            | 0.346                        | 1.325                          | 0.148                          | 9.634           |
| H14 | 55.882          | 174.925   | 120.990  | -                               | 143.79                                | 7.40                            | 10.84                          | -                          | -                               | -                            | -                              | -                              | 9.634           |
| Q15 | 55.730          | 175.703   | 121.840  | 6.26                            | 143.35                                | 8.26                            | 10.73                          | 0.89                       | 1.83                            | 0.346                        | 1.287                          | 0.305                          | 9.634           |
| K16 | 56.214          | 176.249   | 123.600  | 6.22                            | 142.63                                | 8.10                            | 10.50                          | 0.87                       | 2.41                            | 0.302                        | 1.348                          | 0.157                          | 10.106          |
| L17 | 54.948          | 176.784   | 124.340  | 6.69                            | 142.37                                | 8.05                            | 10.25                          | 0.84                       | 2.85                            | 0.326                        | 1.349                          | 0.253                          | 9.676           |
| V18 | 61.763          | 175.143   | 121.840  | 8.30                            | 142.66                                | 8.00                            | 10.63                          | 1.16                       | 2.82                            | 0.304                        | 1.593                          | 0.235                          | 9.676           |
| F19 | 57.278          | 174.795   | 124.710  | 7.70                            | 143.89                                | 8.05                            | 10.35                          | 1.23                       | 2.46                            | 0.287                        | 1.449                          | 0.214                          | 9.403           |
| F20 | 57.131          | 174.745   | 123.300  | 7.74                            | 143.41                                | 8.20                            | 10.50                          | 1.36                       | -                               | 0.281                        | 1.061                          | 0.186                          | 8.953           |
| A21 | 52.192          | 177.276   | 126.430  | 5.60                            | 143.91                                | 8.05                            | 10.85                          | 0.94                       | 2.20                            | 0.296                        | 0.983                          | 0.144                          | 8.281           |
| E22 | 56.425          | 176.157   | 120.220  | 5.95                            | 141.99                                | 8.11                            | 10.66                          | 0.80                       | 2.12                            | 0.187                        | 0.816                          | 0.178                          | 8.014           |
| D23 | 53.905          | 176.625   | 122.060  | 6.64                            | 142.65                                | 7.82                            | 10.43                          | 0.90                       | 2.37                            | 0.278                        | 0.640                          | 0.135                          | 7.702           |
| V24 | 62.656          | 177.116   | 120.960  | 6.82                            | 142.62                                | 7.81                            | 10.26                          | 0.96                       | 2.35                            | 0.232                        | 0.647                          | 0.194                          | 7.012           |
| G25 | 45.277          | 174.538   | 111.970  | 5.96                            | 140.81                                | 7.12                            | 11.24                          | 0.76                       | 3.94                            | -                            | -                              | 0.142                          | 7.181           |
| S26 | 58.383          | 174.523   | 115.710  | 6.51                            | 142.39                                | 8.22                            | 11.25                          | 0.95                       | 2.16                            | 0.235                        | 0.684                          | 0.183                          | 6.711           |
| N27 | 53.109          | 175.504   | 120.760  | 7.32                            | 142.33                                | 7.04                            | 10.19                          | 1.01                       | 2.91                            | 0.235                        | 0.564                          | 0.179                          | 5.697           |
| K28 | 56.560          | 177.232   | 121.970  | 6.46                            | 142.63                                | 7.71                            | 10.25                          | 0.95                       | 2.67                            | 0.306                        | 0.466                          | 0.190                          | 6.178           |
| G29 | 44.934          | 173.744   | 109.760  | 6.03                            | 140.61                                | 7.46                            | 11.51                          | 0.74                       | 3.86                            | -                            | -                              | 0.160                          | 5.531           |
| A30 | 52.385          | 177.673   | 123.750  | 5.49                            | 143.82                                | 8.15                            | 11.05                          | 0.71                       | 2.04                            | 0.147                        | 0.657                          | 0.099                          | 6.261           |
| I31 | 60.896          | 176.472   | 121.030  | 7.65                            | 142.65                                | 8.23                            | 10.27                          | 0.86                       | 2.28                            | 0.172                        | 0.635                          | 0.113                          | 5.797           |
| I32 | 61.026          | 176.682   | 126.600  | 7.45                            | 142.15                                | 7.70                            | 10.10                          | 0.96                       | -                               | 0.139                        | 0.840                          | 0.106                          | 6.254           |
| G33 | 44.928          | 173.720   | 113.360  | 5.96                            | 139.78                                | 7.99                            | 11.47                          | 0.78                       | -                               | -                            | -                              | 0.117                          | 6.102           |
| L34 | 54.945          | 177.356   | 121.870  | 6.72                            | 142.26                                | 8.49                            | 10.51                          | 0.72                       | 2.21                            | 0.135                        | 0.498                          | 0.085                          | 5.567           |
| M35 | 55.076          | 176.195   | 122.260  | 7.25                            | 142.54                                | 7.88                            | 10.65                          | 0.88                       | 2.51                            | 0.162                        | 0.406                          | 0.071                          | 4.973           |
| V36 | 62.421          | 176.738   | 122.730  | 7.49                            | 142.02                                | 7.99                            | 10.64                          | 1.06                       | 2.42                            | 0.107                        | 0.508                          | 0.075                          | 3.794           |
| G37 | 44.993          | 174.494   | 113.430  | 5.98                            | 140.57                                | 7.99                            | 11.48                          | 0.81                       | -                               | -                            | -                              | 0.083                          | 3.808           |
| G38 | 44.830          | 173.723   | 108.890  | 5.99                            | 140.42                                | 8.55                            | 11.97                          | 0.84                       | -                               | -                            | -                              | 0.034                          | 2.701           |
| V39 | 62.323          | 175.602   | 120.130  | 7.94                            | 141.82                                | 8.68                            | 10.67                          | 0.99                       | 2.36                            | 0.038                        | 0.172                          | 0.025                          | 2.225           |
| V40 | 63.667          | -         | 128.630  | 8.62                            | 141.75                                | 7.45                            | 9.75                           | -                          | 2.61                            | 0.029                        | -                              | -                              | 1.656           |
